1 **Exhaustive identification of conserved upstream open reading frames with potential translational**  
2 **regulatory functions from animal genomes**

3

4 Hiro Takahashi<sup>1,2#\*</sup>, Shido Miyaki<sup>2#</sup>, Hitoshi Onouchi<sup>3#</sup>, Taichiro Motomura<sup>1</sup>, Nobuo Idesako<sup>2</sup>, Anna Takahashi<sup>4</sup>,  
5 Shuichi Fukuyoshi<sup>5</sup>, Toshinori Endo<sup>6</sup>, Kenji Satou<sup>7</sup>, Satoshi Naito<sup>3,8</sup>, and Motoyuki Itoh<sup>9\*</sup>

6

7 <sup>1</sup>Graduate School of Medical Sciences, Kanazawa University, Kanazawa 920-1192, Japan

8 <sup>2</sup>Graduate School of Horticulture, Chiba University, Matsudo 271-8510, Japan

9 <sup>3</sup>Graduate School of Agriculture, Hokkaido University, Sapporo 060-8589, Japan

10 <sup>4</sup>Faculty of Information Technologies and Control, Belarusian State University of Informatics and Radio  
11 Electronics, Minsk 220013, Belarus

12 <sup>5</sup>Institute of Medical, Pharmaceutical and Health Sciences, Kanazawa University, Kakuma-machi, Kanazawa,  
13 Ishikawa 920-1192, Japan

14 <sup>6</sup>Graduate School of Information Science and Technology, Hokkaido University, Sapporo 060-0814, Japan

15 <sup>7</sup>Faculty of Biological Science and Technology, Institute of Science and Engineering, Kanazawa University,  
16 Kanazawa 920-1192, Japan

17 <sup>8</sup>Graduate School of Life Science, Hokkaido University, Sapporo 060-0810, Japan

18 <sup>9</sup>Graduate School of Pharmaceutical Science, Chiba University, Chuo-ku, Chiba 260-8675, Japan

19

20 \*Correspondence. Tel: +81-76-234-4484; Fax: +81-76-234-4484; Email: [takahasi@p.kanazawa-u.ac.jp](mailto:takahasi@p.kanazawa-u.ac.jp)

21 Correspondence may also be addressed to Motoyuki Itoh. Email: [mito@chiba-u.jp](mailto:mito@chiba-u.jp)

22 #Joint first authors.

23

24 **Key words:** upstream open reading frame; translational regulation; bioinformatics; nascent peptide

25

26

27

## 28 **Abstract**

29 **Background:** Upstream open reading frames (uORFs) are located in the 5'-untranslated regions of many  
30 eukaryotic mRNAs, and some peptides encoded in these regions play important regulatory roles in controlling  
31 main ORF (mORF) translation. To comprehensively identify uORFs encoding functional peptides, genome-wide  
32 searches for uORFs with conserved peptide sequences (CPuORFs) have been conducted in various organisms  
33 using comparative genomic approaches. However, in animals, CPuORFs have been identified only by comparing  
34 uORF sequences between a limited number of closely related species, and it is unclear how many previously  
35 identified CPuORFs encode regulatory peptides.

36 **Results:** Here, we conducted exhaustive genome-wide searches for animal CPuORFs conserved in various  
37 taxonomic ranges, using the ESUCA pipeline, which we recently developed for efficient comprehensive  
38 identification of CPuORFs. ESUCA can efficiently compare uORF sequences between an unlimited number of  
39 species using BLAST and automatically determine the taxonomic ranges of sequence conservation for each  
40 CPuORF. By applying ESUCA to human, chicken, zebrafish, and fruit fly genomes, 1,430 (1,339 novel and 91  
41 known) CPuORFs were identified. We examined the effects of 14 human CPuORFs on mORF translation using  
42 a transient expression assay. Through this analysis, we identified six novel regulatory CPuORFs that repressed  
43 mORF translation in a sequence-dependent manner, all of which were conserved beyond Amniota.

44 **Conclusions:** We discovered a much higher number of animal CPuORFs than previously identified.  
45 Furthermore, our results suggest that human CPuORFs conserved beyond Amniota are more likely to encode  
46 regulatory peptides than those conserved in narrower taxonomic ranges.

47

## 48 **Background**

49 The human genome contains many regions encoding potential functional small peptides outside of the  
50 well-annotated protein-coding regions (Ingolia, et al., 2014). Some upstream open reading frames (uORFs), which are  
51 located in the 5'-untranslated regions (5'-UTRs) of mRNAs, have been shown to encode such functional small  
52 peptides. Most uORF-encoded peptides play regulatory roles in controlling the translation of protein-coding main  
53 ORFs (mORFs) (Cruz-Vera, et al., 2011; Ito and Chiba, 2013; Morris and Geballe, 2000; Somers, et al., 2013).  
54 During the translation of these regulatory uORFs, nascent peptides interact inside the ribosomal exit tunnel to  
55 cause ribosome stalling (Bhushan, et al., 2010). Ribosome stalling on a uORF results in translational repression of  
56 the downstream mORF because stalled ribosomes block scanning of subsequent pre-initiation complexes and  
57 prevent them from reaching the start codon of the mORF (Wang and Sachs, 1997). In some genes, uORF  
58 peptides are involved in translational regulation in response to metabolites (Ito and Chiba, 2013).

59 To comprehensively identify uORFs encoding functional peptides, genome-wide searches for uORFs  
60 with conserved peptide sequences (CPuORFs) have been conducted using comparative genomic approaches in  
61 plants (Hayden and Jorgensen, 2007; Takahashi, et al., 2019; Takahashi, et al., 2012; Tran, et al., 2008; van der  
62 Horst, et al., 2018; Vaughn, et al., 2012). To date, 157 CPuORF families have been identified by comparing  
63 5'-UTR sequences between plant species. Of these, 101 families were identified in our previous studies by applying  
64 our original methods, BAIUCAS (Takahashi, et al., 2012) and ESUCA (an advanced version of BAIUCAS)  
65 (Takahashi, et al., 2019) to genomes of *Arabidopsis*, rice, tomato, poplar, and grape.

66 ESUCA has many unique functions (Takahashi, et al., 2019), such as efficient comparison of uORF  
67 sequences between an unlimited number of species using BLAST, automatic determination of taxonomic ranges  
68 of CPuORF sequence conservation, systematic calculation of  $K_a/K_s$  ratios of CPuORF sequences, and wide  
69 compatibility with any eukaryotic genome whose sequence database is registered in ENSEMBL (Zerbino, et al.,  
70 2018). More importantly, to distinguish between 'spurious' CPuORFs conserved because they encode parts of  
71 mORF-encoded proteins and 'true' CPuORFs conserved because of the functions of their encoded small peptides,  
72 ESUCA assesses whether a transcript containing a fusion of a uORF and an mORF is a major or minor form  
73 among homologous transcripts (Takahashi, et al., 2019). By using these functions, ESUCA can efficiently

74 identify CPuORFs likely to encode functional small peptides. In fact, our recent study demonstrated that poplar  
75 CPuORFs encoding regulatory peptides were efficiently identified by selecting ones conserved across diverse  
76 eudicots using ESUCA (Takahashi, et al., 2019).

77 To date, only a few studies on genome-wide identification of animal CPuORFs have reported. In these  
78 previous studies, uORF sequences were compared between a limited number of closely related species, such as  
79 human and mouse or several species in dipteran, leading to identification of 204 and 198 CPuORFs in human  
80 and mouse, respectively (Crowe, et al., 2006), and 44 CPuORFs in fruit fly (Hayden and Bosco, 2008).  
81 Additionally, the relationships between taxonomic ranges of CPuORF conservation and the likelihood of having  
82 a regulatory function have not been studied in animals.

83 Accordingly, in this study, we applied ESUCA to genomes of fruit fly, zebrafish, chicken, and human to  
84 exhaustively identify animal CPuORFs and to determine the taxonomic range of their sequence conservation.  
85 Using ESUCA, we identified 1,430 animal (1,339 novel and 91 known) CPuORFs belonging to 1,337 CPuORF  
86 families. We examined the effects of 15 CPuORFs conserved in various taxonomic ranges on mORF translation,  
87 using a transient expression assay. Through this analysis, we identified six novel regulatory CPuORFs that  
88 repress mORF translation in a sequence-dependent manner. All of the six regulatory CPuORFs are conserved  
89 beyond Amniota, suggesting that human CPuORFs conserved beyond Amniota are more likely to encode  
90 functional peptides than those conserved in narrower taxonomic ranges.

91

92

## 93 **Materials and methods**

### 94 **Extraction of CPuORFs using ESUCA**

95 ESUCA was developed as an advanced version of BAIUCAS (Takahashi et al., 2012) in our previous study  
96 (Takahashi et al., 2019). ESUCA consists of six steps, and some of these steps are divided into substeps, as  
97 shown in Fig. 1A and 1B. To identify animal CPuORFs using ESUCA, the following eight-step procedures were  
98 conducted, including the six ESUCA steps: 0) data preparation for ESUCA, 1) uORF extraction from the 5'-UTR,

99 2) calculation of uORF-mORF fusion ratios, 3) uORF-tBLASTn against transcript sequence databases, 4)  
100 mORF-tBLASTn against downstream sequence datasets for each uORF, 5) calculation of  $K_a/K_s$  ratios, 6)  
101 determination of the taxonomic range of uORF sequence conservation, and 7) manual validation after ESUCA.  
102 See the Supplementary Materials and Methods for details.

103

#### 104 **Determination of the taxonomic range of uORF sequence conservation for animal CPuORFs**

105 To apply ESUCA to animal genomes, we defined 19 animal taxonomic categories, as shown in Fig. 1C. See the  
106 Supplementary Materials and Methods for details.

107

#### 108 **Plasmids and reporter assays**

109 DNA fragments containing a control CPuORF (Con) or the frameshift mutant version (fs) of the 15 selected  
110 genes were subcloned into pSV40:UTR:Fluc. Reporter assays were conducted using a Dual-Luciferase Reporter  
111 Assay system (Promega, Madison, WI, USA). See the Supplementary Materials and Methods for details.

112

## 113 **Results**

### 114 **Genome-wide search for animal CPuORFs using ESUCA**

115 Prior to ESUCA application (Fig. 1A and 1B), we counted the number of protein-coding genes for four species,  
116 i.e., fruit fly, zebrafish, chicken, and human. As shown in Supplementary Table S1, 13,938, 25,206, 14,697, and  
117 19,956 genes were extracted for fruit fly, zebrafish, chicken, and human, respectively. After step 1 of ESUCA, we  
118 calculated the numbers of uORFs and protein-coding genes with any uORF for each species. As shown in  
119 Supplementary Table S1, 17,035 (7,066), 39,616 (14,453), 8,929 (3,535), and 44,085 (12,321) uORFs (genes)  
120 were extracted from fruit fly, zebrafish, chicken, and human genomes, respectively. In this analysis, when  
121 multiple uORFs from a gene shared the same stop or start codon, they were counted as one. Potential candidate  
122 CPuORFs were narrowed down by selection at step 2.5 of ESUCA in a step-by-step manner, as shown in  
123 Supplementary Table S1. The numbers of BLAST hits (expressed sequence tag [EST], transcriptome shotgun  
124 assembly [TSA], assembled EST/TSA, and RefSeq RNA sequences) extracted at step 3.5 are also shown in

125 Supplementary Table S1. After the final step of ESUCA, 49, 195, 235, and 1,453 candidate CPuORFs were  
126 extracted from fruit fly, zebrafish, chicken, and human, respectively. We conducted manual validation for the  
127 extracted candidate CPuORFs as described in our previous study (Takahashi, et al., 2019) and in the  
128 Supplementary Materials and Methods. We selected CPuORFs conserved in at least two orders other than the  
129 order to which the original species belongs. In total, 1,430 animal CPuORFs (35 for fruit fly, 151 for zebrafish,  
130 206 for chicken, and 1,038 for human) were identified (Fig. 1D). Of these, 1,339 CPuORFs were newly  
131 identified in the current study. Detailed information on the identified CPuORFs is shown in Supplementary Table  
132 S2. The identified CPuORF-containing genes were classified into 1,124 ortholog groups on the basis of  
133 similarities of mORF-encoded amino acid sequences, using OrthoFinder ver. 1.1.4 (Emms and Kelly, 2015).  
134 CPuORFs with similar amino acid sequences from the same ortholog groups were categorized as the same  
135 CPuORF families (homology groups [HGs]; Supplementary Materials and Methods). The identified 1,430  
136 CPuORFs were classified into 1,337 HGs. We assigned HG numbers to 1,337 HGs in an order based on numbers  
137 of orders in which any CPuORF belonging to each HG was extracted, the taxonomic range of the sequence  
138 conservation of each HG, and gene ID numbers. When multiple CPuORF families were identified in the same  
139 ortholog groups, the same HG number with a different subnumber was assigned to each of the families.

140

#### 141 **Sequence-dependent effects of CPuORFs on mORF translation**

142 To address the relationship between taxonomic ranges of CPuORF conservation and likelihood of having  
143 regulatory function, we selected 15 human CPuORFs conserved in various taxonomic ranges, including a  
144 previously identified sequence-dependent regulatory CPuORF, the *PTP4A1* CPuORF (Hardy, et al., 2019), as a  
145 positive control, and examined their sequence-dependent effects on the expression of the downstream reporter  
146 gene using transient expression assays (Fig. 2). Other uORFs overlapping any of the selected CPuORFs were  
147 eliminated by introducing mutations that changed the ATG codons of the overlapping uORFs to other codons but  
148 did not alter the amino acid sequences of the CPuORFs (Supplementary Fig. S5). The resulting modified  
149 CPuORFs were used as Con CPuORFs (Fig. 2B). To assess the importance of amino acid sequences for the  
150 effects of these CPuORFs on mORF translation, fs mutations were introduced into the Con CPuORFs such that

151 the amino acid sequences of their conserved regions could be altered (see Supplementary Materials and Methods  
152 and Supplementary Fig. S1 for details). In seven of the 15 CPuORFs, the introduced frameshift mutations  
153 significantly upregulated the expression of the reporter gene, indicating that these CPuORFs repressed mORF  
154 translation in a sequence-dependent manner (Fig. 2C). All of the seven CPuORFs with the sequence-dependent  
155 repressive effects were conserved beyond Amniota (Fig. 2A). In contrast, any of four CPuORFs conserved only  
156 among Amniota did not show significant sequence-dependent effects (Fig. 2C). These results suggest that human  
157 CPuORFs conserved beyond Amniota are more likely to encode regulatory peptides than those conserved in  
158 narrower taxonomic ranges.

159

## 160 **Discussion**

161 In the current study, by applying ESUCA to four animal genomes, we identified 1,430 CPuORFs belonging to  
162 1,337 HGs. Taxonomic ranges of sequence conservation of these CPuORFs largely vary, demonstrating that  
163 ESUCA can identify CPuORFs conserved in various taxonomic ranges (Supplementary Table S3). Moreover,  
164 seven of 11 human CPuORFs conserved beyond Amniota exhibited sequence-dependent repressive effects on  
165 mORF translation, whereas all four CPuORFs conserved only among Amniota showed no significant  
166 sequence-dependent effects. This result suggest that human CPuORFs conserved beyond Amniota are more  
167 likely to encode regulatory peptides than those conserved in narrower taxonomic ranges. Of the 1,038 CPuORFs  
168 extracted from the human genome, 78 are conserved beyond Amniota (Supplementary Table S3). Therefore,  
169 these 78 CPuORFs are promising candidates of regulatory CPuORFs encoding peptides that control mORF  
170 translation. CPuORFs encoding functional peptides may also be found among the remaining human CPuORFs  
171 conserved in narrower taxonomic ranges because the  $K_a/K_s$  ratios suggest that purifying selection acted on the  
172 amino acid sequences of these CPuORFs.

173 In this study, we identified six novel human regulatory CPuORFs (in the *MKKS*, *SLC6A8*, *FAM13B*,  
174 *MIEF1*, *KAT6A*, and *LRRC8B* genes) with sequence-dependent repressive effects on mORF translation. Of these,  
175 the *MKKS* CPuORF is a translational regulator that represses the production of a protein involved in  
176 McKusick-Kaufman syndrome (Akimoto, et al., 2013); however, the amino acid sequence dependence of the

177 CPuORF function was not reported. Interestingly, the *MIEF1* CPuORF-encoded peptide is a functional peptide  
178 localized in the mitochondria (Samandi, et al., 2017). Thus, the *MIEF1* CPuORF may have dual functions.

179 Chemical screening recently identified a compound that causes nascent peptide-mediated ribosome  
180 stalling in the mORF of the human *PCSK9* gene, resulting in specific translational inhibition of *PCSK9* and a  
181 reduction in total plasma cholesterol levels (Lintner, et al., 2017). Nascent peptide-mediated ribosome stalling in  
182 some of the previously identified regulatory CPuORFs is promoted by metabolites, such as polyamine, arginine,  
183 and sucrose (Ito and Chiba, 2013; Yamashita, et al., 2017). Therefore, compounds that promote nascent  
184 peptide-mediated ribosome stalling in CPuORFs could be identified by chemical screening through a method  
185 similar to that used for the screening of the stall-inducing compound for *PCSK9*. The data from the current study  
186 may be useful for selection of CPuORFs as potential targets for pharmaceutical drugs and for identification of  
187 regulatory CPuORFs.

188

189 **Funding:** This work was supported by the Japan Society for the Promotion of Science (JSPS) KAKENHI (grant  
190 nos. JP16K07387 to H.O., JP18H03330 to H.T. and H.O., JP18H02568 to M.I.); the Ministry of Education,  
191 Culture, Sports, Science and Technology (MEXT) KAKENHI (grant nos. JP17H05658 to S.N., JP26114703 to  
192 H.T, JP17H05659 to H.T); and the Naito Foundation (to H.O.).

193

194 **Competing interests:** none declared.

195

196

197

198

199

200

201

202

203



## 204 **References**

- 205 Akimoto, C., *et al.* (2013) Translational repression of the McKusick-Kaufman syndrome transcript by unique  
206 upstream open reading frames encoding mitochondrial proteins with alternative polyadenylation sites,  
207 *Biochim Biophys Acta*, **1830**, 2728-2738.
- 208 Bhushan, S., *et al.* (2010) Structural basis for translational stalling by human cytomegalovirus and fungal arginine  
209 attenuator peptide, *Mol. Cell*, **40**, 138-146.
- 210 Crowe, M.L., Wang, X.Q. and Rothnagel, J.A. (2006) Evidence for conservation and selection of upstream open  
211 reading frames suggests probable encoding of bioactive peptides, *BMC Genomics*, **7**, 16.
- 212 Cruz-Vera, L.R., *et al.* (2011) Nascent polypeptide sequences that influence ribosome function, *Curr. Opin.*  
213 *Microbiol.*, **14**, 160-166.
- 214 Emms, D.M. and Kelly, S. (2015) OrthoFinder: solving fundamental biases in whole genome comparisons  
215 dramatically improves orthogroup inference accuracy, *Genome Biol.*, **16**, 157.
- 216 Hardy, S., *et al.* (2019) Magnesium-sensitive upstream ORF controls PRL phosphatase expression to mediate  
217 energy metabolism, *Proc Natl Acad Sci U S A*, **116**, 2925-2934.
- 218 Hayden, C.A. and Bosco, G. (2008) Comparative genomic analysis of novel conserved peptide upstream open  
219 reading frames in *Drosophila melanogaster* and other dipteran species, *BMC Genomics*, **9**, 61.
- 220 Hayden, C.A. and Jorgensen, R.A. (2007) Identification of novel conserved peptide uORF homology groups in  
221 *Arabidopsis* and rice reveals ancient eukaryotic origin of select groups and preferential association with  
222 transcription factor-encoding genes, *BMC Biol.*, **5**, 32.
- 223 Ingolia, N.T., *et al.* (2014) Ribosome profiling reveals pervasive translation outside of annotated protein-coding  
224 genes, *Cell Rep.*, **8**, 1365-1379.
- 225 Ito, K. and Chiba, S. (2013) Arrest peptides: cis-acting modulators of translation, *Annu. Rev. Biochem.*, **82**,  
226 171-202.
- 227 Lintner, N.G., *et al.* (2017) Selective stalling of human translation through small-molecule engagement of the

- 228 ribosome nascent chain, *PLoS Biol*, **15**, e2001882.
- 229 Morris, D.R. and Geballe, A.P. (2000) Upstream open reading frames as regulators of mRNA translation, *Mol.*  
230 *Cell Biol.*, **20**, 8635-8642.
- 231 Samandi, S., *et al.* (2017) Deep transcriptome annotation enables the discovery and functional characterization of  
232 cryptic small proteins, *Elife*, **6**.
- 233 Somers, J., Poyry, T. and Willis, A.E. (2013) A perspective on mammalian upstream open reading frame  
234 function, *Int. J. Biochem. Cell Biol.*, **45**, 1690-1700.
- 235 Takahashi, H., *et al.* (2019) ESUCA: a pipeline for genome-wide identification of upstream open reading frames  
236 with evolutionarily conserved sequences and determination of the taxonomic range of their conservation,  
237 *bioRxiv*, 524090.
- 238 Takahashi, H., *et al.* (2012) BAIUCAS: a novel BLAST-based algorithm for the identification of upstream open  
239 reading frames with conserved amino acid sequences and its application to the *Arabidopsis thaliana* genome,  
240 *Bioinformatics*, **28**, 2231-2241.
- 241 Tran, M.K., Schultz, C.J. and Baumann, U. (2008) Conserved upstream open reading frames in higher plants,  
242 *BMC Genomics*, **9**, 361.
- 243 van der Horst, S., *et al.* (2018) Novel pipeline identifies new upstream ORFs and non-AUG initiating main ORFs  
244 with conserved amino acid sequences in the 5' leader of mRNAs in *Arabidopsis thaliana*, *RNA*, **25**,  
245 292-304.
- 246 Vaughn, J.N., *et al.* (2012) Known and novel post-transcriptional regulatory sequences are conserved across plant  
247 families, *RNA*, **18**, 368-384.
- 248 Wang, Z. and Sachs, M.S. (1997) Ribosome stalling is responsible for arginine-specific translational attenuation  
249 in *Neurospora crassa*, *Mol. Cell Biol.*, **17**, 4904-4913.
- 250 Yamashita, Y., *et al.* (2017) Sucrose sensing through nascent peptide-mediated ribosome stalling at the stop  
251 codon of *Arabidopsis bZIP11* uORF2, *FEBS Lett.*, **591**, 1266-1277.
- 252 Zerbino, D.R., *et al.* (2018) Ensembl 2018, *Nucleic Acids Res.*, **46**, D754-D761.

253  
254  
255  
256  
257  
258  
259  
260  
261  
262  
263  
264  
265  
266  
267  
268  
269  
270  
271  
272  
273  
274  
275  
276  
277  
278  
279

## Figure Legends

**Figure 1.** Identification of animal CPuORFs using ESUCA. (A) Data preparation. (B) Outline of the ESUCA pipeline. Numbers with parenthesis indicate datasets labeled with the same numbers in A. (C) Defined animal taxonomic categories. (D) Numbers of identified CPuORFs.

**Figure 2.** Taxonomic conservation and experimental validation of 15 selected human CPuORFs. (A) Taxonomic ranges of conservation of CPuORFs examined in transient assays. Filled cells in each taxonomic category indicate the presence of uORF-tBLASTn and mORF-tBLASTn hits for CPuORFs of the indicated genes. (B) Reporter constructs used for transient assays. The hatched box in the frameshift (fs) mutant CPuORF indicates the frame-shifted region. Dotted boxes represent the first five nucleotides of the mORFs associated with the 15 human CPuORFs. (C) Relative luciferase activities of control (white) or frameshift (gray) CPuORF reporter plasmids. Means  $\pm$  SDs of three biological replicates are shown.  $*p < 0.05$ .

280

## 281 **Supplementary Figure Legend**

282 **Figure S1.** Nucleotide sequences of the 5'-UTRs and amino acid sequences of the CPuORFs analyzed in this  
283 study. (AO) The 5'-UTRs of *PTP4A1* (A), *MKKS* (B), *SLC6A8* (C), *FAM13B* (D), *MIEF1* (E), *EIF5* (F),  
284 *MAPK6* (G), *MEIS2* (H), *KAT6A* (I), *SLC35A4* (J), *LRRC8B* (K), *CDH11* (L), *PNRC2* (M), *BACH2* (N), and  
285 *FGF9* (O). The nucleotide sequences of the CPuORFs are shown in bold. The deduced amino acid sequences of  
286 the control (Con) and frameshift (fs) CPuORFs are indicated. The nucleotide sequences of other uORFs are  
287 underlined with a bold line. Dotted underlines indicate the nucleotide sequences of other uORFs overlapping the  
288 CPuORFs, whose initiation codons were altered to other codons by introducing nucleotide substitutions that did  
289 not change the amino acid sequences of the CPuORFs. The replaced nucleotides are shown as white letters in a  
290 black background. The nucleotides that were deleted and inserted in the frameshift mutants are shaded. The main  
291 coding sequences that were contained in the reporter constructs are boxed. The shaded boxes indicate the  
292 nucleotides changed to avoid the appearance of in-frame termination codons. Cloning sites were added at either  
293 end of the nucleotide sequences in controls to be subcloned into plasmid pGL4.10 with an SV40 promoter  
294 (pSV40:5'UTR::luc2) are underlined (Fig. 2B).

295

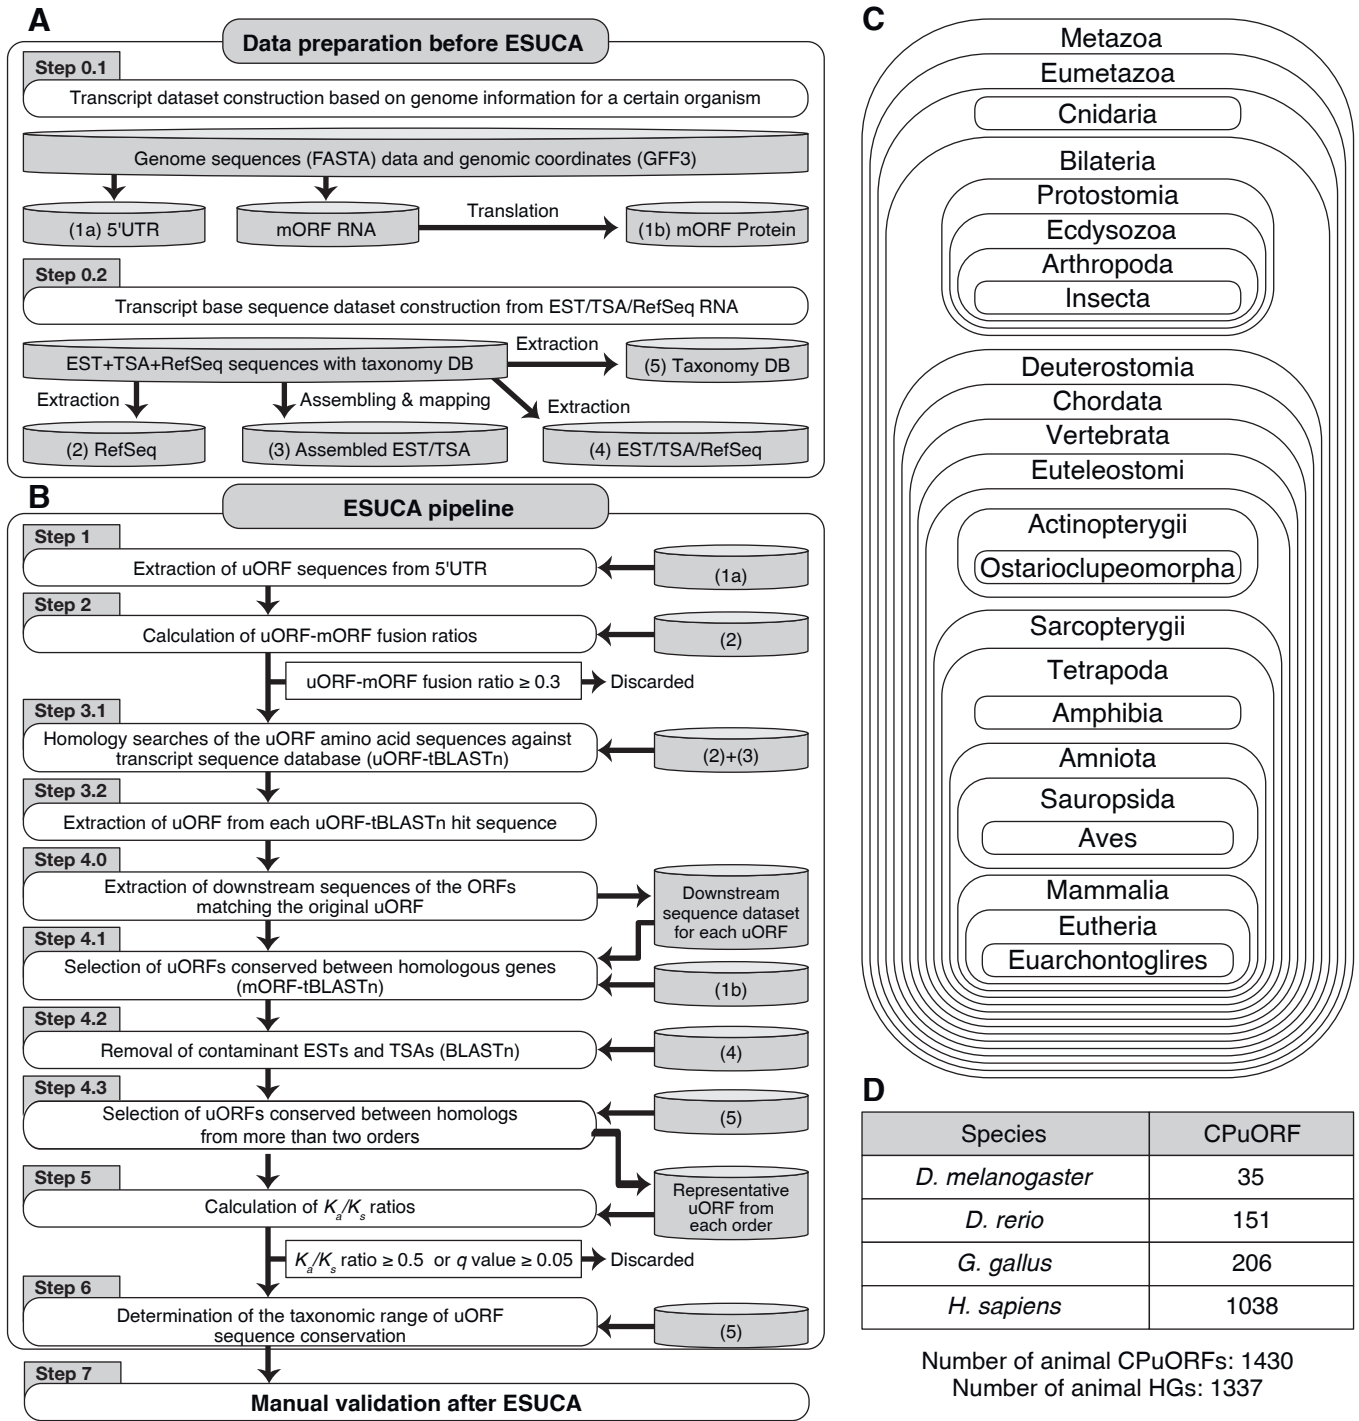

## Figure 2

**A**

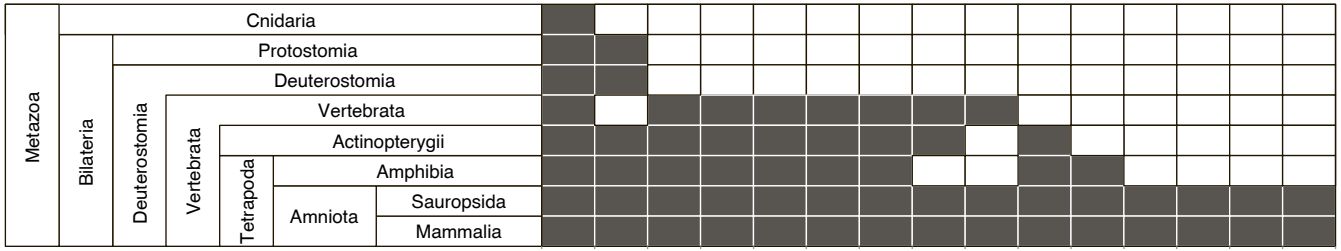

**B**

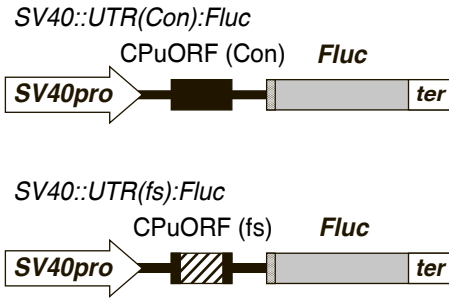

**C**

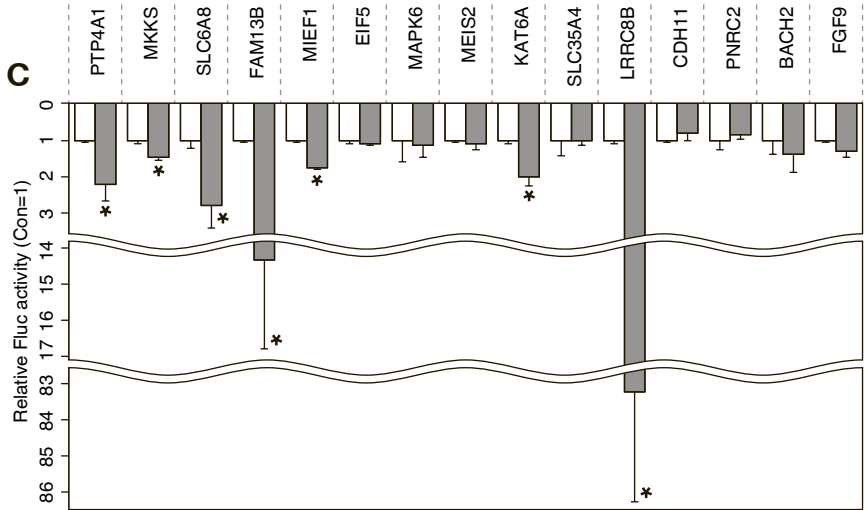

Source: http://biorxiv.org/content/10.1101/672840v1.full.pdf
