1 **Exhaustive identification of conserved upstream open reading frames with potential translational**  
2 **regulatory functions from animal genomes**

3

4 Hiro Takahashi<sup>1,2#\*</sup>, Shido Miyaki<sup>2#</sup>, Hitoshi Onouchi<sup>3#</sup>, Taichiro Motomura<sup>1</sup>, Nobuo Idesako<sup>2</sup>, Anna Takahashi<sup>4</sup>,  
5 Masataka Murase<sup>1</sup>, Shuichi Fukuyoshi<sup>5</sup>, Toshinori Endo<sup>6</sup>, Kenji Satou<sup>7</sup>, Satoshi Naito<sup>3,8</sup>, and Motoyuki Itoh<sup>9\*</sup>

6

7 <sup>1</sup>Graduate School of Medical Sciences, Kanazawa University, Kanazawa 920-1192, Japan

8 <sup>2</sup>Graduate School of Horticulture, Chiba University, Matsudo 271-8510, Japan

9 <sup>3</sup>Graduate School of Agriculture, Hokkaido University, Sapporo 060-8589, Japan

10 <sup>4</sup>Faculty of Information Technologies and Control, Belarusian State University of Informatics and Radio  
11 Electronics, Minsk 220013, Belarus

12 <sup>5</sup>Institute of Medical, Pharmaceutical and Health Sciences, Kanazawa University, Kakuma-machi, Kanazawa,  
13 Ishikawa 920-1192, Japan

14 <sup>6</sup>Graduate School of Information Science and Technology, Hokkaido University, Sapporo 060-0814, Japan

15 <sup>7</sup>Faculty of Biological Science and Technology, Institute of Science and Engineering, Kanazawa University,  
16 Kanazawa 920-1192, Japan

17 <sup>8</sup>Graduate School of Life Science, Hokkaido University, Sapporo 060-0810, Japan

18 <sup>9</sup>Graduate School of Pharmaceutical Science, Chiba University, Chuo-ku, Chiba 260-8675, Japan

19

20 \*Correspondence. Tel: +81-76-234-4484; Fax: +81-76-234-4484; Email: [takahasi@p.kanazawa-u.ac.jp](mailto:takahasi@p.kanazawa-u.ac.jp)

21 Correspondence may also be addressed to Motoyuki Itoh. Email: [mito@chiba-u.jp](mailto:mito@chiba-u.jp)

22 #Joint first authors.

23

24 **Key words:** upstream open reading frame; translational regulation; bioinformatics; nascent peptide

25

26

27

## 28 **Abstract**

29 Upstream open reading frames (uORFs) are present in the 5'-untranslated regions of many eukaryotic mRNAs,  
30 and some peptides encoded in these regions play important regulatory roles in controlling main ORF (mORF)  
31 translation. We previously developed a novel pipeline, ESUCA, to comprehensively identify plant uORFs  
32 encoding functional peptides, based on genome-wide identification of uORFs with conserved peptide sequences  
33 (CPuORFs). Here, we applied ESUCA to diverse animal genomes, because animal CPuORFs have been  
34 identified only by comparing uORF sequences between a limited number of closely related species, and how  
35 many previously identified CPuORFs encode regulatory peptides is unclear. By using ESUCA, 1,517 (1,425  
36 novel and 92 known) CPuORFs were extracted from four evolutionarily divergent animal genomes. We  
37 examined the effects of 17 human CPuORFs on mORF translation using transient expression assays. Through  
38 these analyses, we identified seven novel regulatory CPuORFs that repressed mORF translation in a  
39 sequence-dependent manner, including the one conserved only among Eutheria. We discovered a much higher  
40 number of animal CPuORFs than previously identified. Since most human CPuORFs identified in this study are  
41 conserved across a wide range of Eutheria or a wider taxonomic range, many CPuORFs encoding regulatory  
42 peptides are expected to be found in the identified CPuORFs.

## 43 **Introduction**

44 The human genome contains many regions encoding potential functional small peptides outside of the  
45 well-annotated protein-coding regions <sup>1</sup>. Some upstream open reading frames (uORFs), which are located in the  
46 5'-untranslated regions (5'-UTRs) of mRNAs, have been shown to encode such functional small peptides. Most  
47 uORF-encoded peptides play regulatory roles in controlling the translation of protein-coding main ORFs  
48 (mORFs) <sup>2-5</sup>. During the translation of these regulatory uORFs, nascent peptides interact inside the ribosomal exit  
49 tunnel to cause ribosome stalling <sup>6</sup>. Ribosome stalling on a uORF results in translational repression of the  
50 downstream mORF because stalled ribosomes block scanning of subsequent pre-initiation complexes and  
51 prevent them from reaching the start codon of the mORF <sup>7</sup>. In some genes, uORF peptides are involved in  
52 translational regulation in response to metabolites (Ito and Chiba, 2013).

53 To comprehensively identify uORFs encoding functional peptides, genome-wide searches for uORFs  
54 with conserved peptide sequences (CPuORFs) have been conducted using comparative genomic approaches in  
55 plants <sup>8-13</sup>. To date, 157 CPuORF families have been identified by comparing 5'-UTR sequences between plant  
56 species. Of these, 101 families were identified in our previous studies by applying our original methods,  
57 BAIUCAS <sup>10</sup> and ESUCA (an advanced version of BAIUCAS) <sup>13</sup> to genomes of *Arabidopsis*, rice, tomato,  
58 poplar, and grape.

59 ESUCA has many unique functions <sup>13</sup>, such as efficient comparison of uORF sequences between an  
60 unlimited number of species using BLAST, automatic determination of taxonomic ranges of CPuORF sequence  
61 conservation, systematic calculation of  $K_a/K_s$  ratios of CPuORF sequences, and wide compatibility with any  
62 eukaryotic genome whose sequence database is registered in ENSEMBL <sup>14</sup>. More importantly, to distinguish  
63 between 'spurious' CPuORFs conserved because they encode parts of mORF-encoded proteins and 'true'  
64 CPuORFs conserved because of the functions of their encoded small peptides, ESUCA assesses whether a  
65 transcript containing a fusion of a uORF and an mORF is a major or minor form among homologous transcripts  
66 <sup>13</sup>. By using these functions, ESUCA can efficiently identify CPuORFs likely to encode functional small peptides.  
67 In fact, our recent study demonstrated that poplar CPuORFs encoding regulatory peptides were efficiently

68 identified by selecting ones conserved across diverse eudicots using ESUCA<sup>13</sup>.

69 To date, only a few studies on genome-wide identification of animal CPuORFs have reported. In these  
70 previous studies, uORF sequences were compared between a limited number of closely related species, such as  
71 human and mouse or several species in dipteran, leading to identification of 204 and 198 CPuORFs in human  
72 and mouse, respectively<sup>15</sup>, and 44 CPuORFs in fruit fly<sup>16</sup>. Additionally, the relationships between taxonomic  
73 ranges of CPuORF conservation and the likelihood of having a regulatory function have not been studied in  
74 animals.

75 Accordingly, in this study, we applied ESUCA to genomes of fruit fly, zebrafish, chicken, and human to  
76 exhaustively identify animal CPuORFs and to determine the taxonomic range of their sequence conservation.  
77 Using ESUCA, we identified 1,517 animal (1,425 novel and 92 known) CPuORFs belonging to 1,430 CPuORF  
78 families. We examined the effects of 17 CPuORFs conserved in various taxonomic ranges on mORF translation,  
79 using transient expression assays. Through this analysis, we identified seven novel regulatory CPuORFs that  
80 repress mORF translation in a sequence-dependent manner.

81

## 82 **Results**

### 83 **Genome-wide search for animal CPuORFs using ESUCA**

84 Prior to ESUCA application (Fig. 1a and 1b), we counted the number of protein-coding genes for four species,  
85 i.e., fruit fly, zebrafish, chicken, and human. As shown in Supplementary Table S1, 13,938, 25,206, 14,697, and  
86 19,956 genes were extracted for fruit fly, zebrafish, chicken, and human, respectively. After step 1 of ESUCA, we  
87 calculated the numbers of uORFs and protein-coding genes with any uORF for each species. As shown in  
88 Supplementary Table S1, 17,035 (7,066), 39,616 (14,453), 8,929 (3,535), and 44,085 (12,321) uORFs (genes)  
89 were extracted from fruit fly, zebrafish, chicken, and human genomes, respectively. In this analysis, when  
90 multiple uORFs from a gene shared the same stop or start codon, they were counted as one. Potential candidate  
91 CPuORFs were narrowed down by selection at step 2 of ESUCA in a step-by-step manner, as shown in  
92 Supplementary Table S1. The numbers of BLAST hits (expressed sequence tag [EST], transcriptome shotgun

93 assembly [TSA], assembled EST/TSA, and RefSeq RNA sequences) extracted at step 3.2 are also shown in  
94 Supplementary Table S1. After the final step of ESUCA, 49, 192, 261, and 1,495 candidate CPuORFs were  
95 extracted from fruit fly, zebrafish, chicken, and human, respectively. We conducted manual validation for the  
96 extracted candidate CPuORFs as described in our previous study<sup>13</sup>. We selected CPuORFs conserved in at least  
97 two orders other than the order to which the original species belongs; subsequently, we classified these selected  
98 CPuORFs on the basis of animal taxonomic categories (Fig. 2) (see the Methods for details). In total, 1,517  
99 animal CPuORFs (37 for fruit fly, 156 for zebrafish, 230 for chicken, and 1,094 for human) were identified (Fig.  
100 3). Of these, 1,425 CPuORFs were newly identified in the current study. All alignments and detailed information  
101 on the identified CPuORFs are shown in Supplementary Figure S1 and Table S2, respectively. The identified  
102 CPuORF-containing genes were classified into 1,363 ortholog groups on the basis of similarities of  
103 mORF-encoded amino acid sequences, using OrthoFinder<sup>17</sup>. CPuORFs with similar amino acid sequences from  
104 the same ortholog groups were categorized as the same CPuORF families (homology groups [HGs]; see the  
105 Methods for details). The identified 1,517 CPuORFs were classified into 1,430 HGs. We assigned HG numbers  
106 to 1,430 HGs in an order based on numbers of orders in which any CPuORF belonging to each HG was  
107 extracted, the taxonomic range of the sequence conservation of each HG, and gene ID numbers. When multiple  
108 CPuORF families were identified in the same ortholog groups, the same HG number with a different subnumber  
109 was assigned to each of the families (e.g., HG0004.1 and HG0004.2; Supplementary Table S2).

110

### 111 **Sequence-dependent effects of CPuORFs on mORF translation**

112 To address the relationship between taxonomic ranges of CPuORF conservation and likelihood of having  
113 regulatory function, we selected 17 human CPuORFs conserved in various taxonomic ranges, including a  
114 previously identified sequence-dependent regulatory CPuORF, the *PTP4A1* CPuORF<sup>18</sup>, as a positive control,  
115 and examined their sequence-dependent effects on the expression of the downstream reporter gene using transient  
116 expression assays (Fig. 4). Other uORFs overlapping any of the selected CPuORFs were eliminated by  
117 introducing mutations that changed the ATG codons of the overlapping uORFs to other codons but did not alter  
118 the amino acid sequences of the CPuORFs (Supplementary Figure S2). The resulting modified CPuORFs were

119 used as CPuORFs bearing the wild-type amino acid sequences (WT-aa CPuORFs) (Fig. 4b). To assess the  
120 importance of amino acid sequences for the effects of these CPuORFs on mORF translation, frameshift  
121 mutations were introduced into the WT-aa CPuORFs such that the amino acid sequences of their conserved  
122 regions could be altered (see Methods and Supplementary Figure S2 for details). In eight of the 17 CPuORFs, the  
123 introduced frameshift mutations significantly upregulated the expression of the reporter gene, indicating that these  
124 CPuORFs repressed mORF translation in a sequence-dependent manner (Fig. 4c). One of the eight  
125 sequence-dependent regulatory CPuORFs, the *TMEM184C* CPuORF, is conserved only among Eutheria (Fig.  
126 4a). This result suggests that CPuORFs conserved only among Eutheria can have sequence-dependent regulatory  
127 effects.

128

## 129 Discussion

130 In the current study, by applying ESUCA to four animal genomes, we identified 1,517 CPuORFs belonging to  
131 1,430 HGs. Taxonomic ranges of sequence conservation of these CPuORFs largely vary, demonstrating that  
132 ESUCA can identify CPuORFs conserved in various taxonomic ranges (Supplementary Table S3). We examined  
133 the effects of 17 human CPuORFs conserved beyond Euarchontoglires on mORF translation, and identified  
134 seven novel sequence-dependent regulatory CPuORFs (in the *MKKS*, *SLC6A8*, *FAM13B*, *MIEF1*, *KAT6A*,  
135 *LRRC8B*, and *TMEM184C* genes). Of these, the *TMEM184C* CPuORF is one of those conserved in the narrowest  
136 taxonomic range among the tested CPuORFs. This suggests that human CPuORFs conserved beyond  
137 Euarchontoglires are likely to be conserved because of functional constraints of their encoded peptides. Of the  
138 1,094 CPuORFs extracted from the human genome, 1,082 are conserved beyond Euarchontoglires (Fig. 3 and  
139 Supplementary Table S3). Therefore, many CPuORFs encoding regulatory peptides are expected to be found in  
140 the human CPuORFs identified in this study.

141 Of the sequence-dependent regulatory CPuORFs identified here, the *MKKS* CPuORF has been  
142 previously reported to be a translational regulator that represses the production of a protein involved in  
143 McKusick-Kaufman syndrome<sup>19</sup>; however, the amino acid sequence dependence of the CPuORF function was  
144 not reported. Interestingly, the *MIEF1* CPuORF-encoded peptide is a functional peptide localized in the  
145 mitochondria<sup>20</sup>. Thus, the *MIEF1* CPuORF may have dual functions.

146 As shown in Fig. 1a and the Methods, we constructed a transcript sequence dataset with reduced  
147 redundancy, according to our previous study<sup>13</sup>. Numbers of bases and sequences of EST/TSA and RefSeq and  
148 their assembling results are shown in Supplementary Table S4. Although numbers of sequences were not reduced,  
149 the numbers of bases were reduced to approximately half. The calculation time of BLAST was proportional to  
150 the database size. Most of the calculation time for ESUCA was because of BLAST. Therefore, the calculation  
151 time for ESUCA could be reduced by using assembled EST/TSA+RefSeq datasets (transcript sequence datasets  
152 with reduced redundancy) instead of intact EST/TSA/RefSeq datasets. Although we could narrow down the  
153 assembled EST/TSA+RefSeq dataset by using an EST clustering method, such as CD-HIT<sup>21</sup>, we did not conduct  
154 such a reduction, because there was a risk of selecting a sequence without a 5'-UTR as a representative sequence  
155 from a mixed cluster of one with the 5'-UTR and one without. Therefore, the assembled EST/TSA+RefSeq  
156 database was used at step 3.1 of ESUCA.

157 Supplementary Table S1 shows that the numbers of uORFs and genes with uORFs were greatly  
158 reduced at steps 1, 2, and 4.3 of ESUCA. Obviously, two steps, i.e., steps 1 and 4.3, were important because  
159 conservation of uORFs was estimated during these steps. Step 2 was newly implemented in ESUCA to  
160 distinguish between 'spurious' CPuORFs and 'true' CPuORFs<sup>13</sup>. In the case of CPuORF estimation without this  
161 step, we estimated the number of uORFs from which 'spurious' CPuORFs could be incorrectly identified as  
162 'true' CPuORFs. As shown in Supplementary Table S5, approximately 20% of potential 'spurious' CPuORFs  
163 were found among uORFs that overlapped with mORFs of other splice variants according to the genomic  
164 information of the original species. Such 'spurious' uORFs were likely to remain in the final result as 'true'  
165 CPuORFs. Although 35 candidate CPuORFs were extracted by BAIUCAS in our previous study<sup>10</sup>, of these 35, 12  
166 uORFs were judged as 'spurious' CPuORFs by our manual validation. These results suggested that CPuORF  
167 determination based on sequence conservation of uORFs and mORFs, without filtering uORFs using the  
168 uORF-mORF fusion ratio, yielded approximately 30% 'spurious' CPuORFs. Therefore, step 2 of ESUCA is an  
169 important function for identification of CPuORFs. That is, ESUCA is superior to other conventional methods  
170 because it can exclude 'spurious' CPuORFs.

171 Chemical screening recently identified a compound that causes nascent peptide-mediated ribosome  
172 stalling in the mORF of the human *PCSK9* gene, resulting in specific translational inhibition of *PCSK9* and a  
173 reduction in total plasma cholesterol levels<sup>22</sup>. Nascent peptide-mediated ribosome stalling in some of the

174 previously identified regulatory CPuORFs is promoted by metabolites, such as polyamine, arginine, and sucrose  
175 <sup>4,23</sup>. Therefore, compounds that promote nascent peptide-mediated ribosome stalling in CPuORFs could be  
176 identified by chemical screening through a method similar to that used for the screening of the stall-inducing  
177 compound for *PCSK9*. The data from the current study may be useful for selection of CPuORFs as potential  
178 targets for pharmaceutical drugs and for identification of regulatory CPuORFs.

179

## 180 **Methods**

181 All procedures and protocols were approved by the Institutional Safety Committee for Recombinant DNA  
182 Experiments at Chiba University. All methods were carried out in accordance with approved guidelines.

183

### 184 **Extraction of CPuORFs using ESUCA**

185 ESUCA was developed as an advanced version of BAIUCAS <sup>10</sup> in our previous study <sup>13</sup>. ESUCA consists of six  
186 steps, and some of these steps are divided into substeps, as shown in Fig. 1a and 1b. To identify animal CPuORFs  
187 using ESUCA, the following eight-step procedures were conducted, including the six ESUCA steps: 0) data  
188 preparation for ESUCA, 1) uORF extraction from the 5'-UTR (Fig. 5), 2) calculation of uORF-mORF fusion  
189 ratios (Fig. 6), 3) uORF-tBLASTn against transcript sequence databases (Fig. 7a), 4) mORF-tBLASTn against  
190 downstream sequence datasets for each uORF (Fig. 7b and 7c), 5) calculation of  $K_a/K_s$  ratios (Fig. 8), 6)  
191 determination of the taxonomic range of uORF sequence conservation, and 7) manual validation after ESUCA.  
192 See the Materials and Methods in our previous study <sup>13</sup> for details.

193

### 194 **Transcript dataset construction based on genome information (step 0.1)**

195 To identify plant CPuORFs, data preparation for ESUCA (step 0.1) was conducted as described in our previous  
196 study <sup>13</sup>. We conducted data preparation for ESUCA to identify animal CPuORFs as follows. We used a genome  
197 sequence file in FASTA format and a genomic coordinate file in GFF3 format obtained from Ensemble Metazoa  
198 Release 33 (<https://metazoa.ensembl.org/index.html>)<sup>24</sup> to extract fruit fly (*Drosophila melanogaster*) uORF  
199 sequences. We used genome sequence files in FASTA format and genomic coordinate files in GFF3 format  
200 obtained from Ensemble Release 86 (<https://metazoa.ensembl.org/index.html>)<sup>24</sup> for zebrafish (*Danio rerio*),



201 chicken (*Gallus gallus*), and human (*Homo sapiens*). We extracted exon sequences from genome sequences on  
202 the basis of genomic coordinate information and constructed transcript sequence datasets by combining exon  
203 sequences. On the basis of the transcription start site and the translation initiation codon of each transcript in the  
204 genomic coordinate files, we extracted 5'-UTR and mORF RNA sequences from the transcript sequence datasets,  
205 as shown in Fig. 1a (step 0.1). The 5'-UTR sequences were used at step 1 of ESUCA. The mORF RNA  
206 sequences were translated into amino acid sequences (mORF proteins) and used at step 4.1 of ESUCA.

207

### 208 **Transcript base sequence dataset construction from EST/TSA/RefSeq RNA (step 0.2)**

209 To identify plant CPuORFs, data preparation for ESUCA (step 0.2) was conducted as described in our previous  
210 study<sup>13</sup>. We conducted data preparation for ESUCA to identify animal CPuORFs. As shown in Fig. 1b, Metazoa  
211 RefSeq RNA sequences were used at steps 2 and 3.1 of ESUCA. Assembled EST/TSA sequences generated by  
212 using velvet<sup>25</sup> and Bowtie2<sup>26</sup>, were used at step 3.1 of ESUCA. Intact and merged EST/TSA/RefSeq sequences  
213 were used at step 4.2 of ESUCA. Taxonomy datasets derived from EST/TSA/RefSeq databases were used at  
214 steps 4.3 and 6 of ESUCA. See the Materials and Methods in our previous study<sup>13</sup> for details.

215

### 216 **Determination of the taxonomic range of uORF sequence conservation for animal CPuORFs (step 6)**

217 To automatically determine the taxonomic range of the sequence conservation of each CPuORF, we first defined  
218 20 animal taxonomic categories (Fig. 2). The 20 taxonomic defined categories were Euarchontoglires, Eutheria  
219 other than Euarchontoglires, Mammalia other than Eutheria, Aves, Sauropsida other than Aves, Amphibia  
220 (Tetrapoda other than Sauropsida and Mammalia), Sarcopterygii other than Tetrapoda, Ostarioclupeomorpha,  
221 Actinopterygii other than Ostarioclupeomorpha, Vertebrata other than Euteleostomi (Actinopterygii and  
222 Sarcopterygii), Chordata other than Vertebrata, Deuterostomia other than Chordata, Insecta, Arthropoda other  
223 than Insecta, Ecdysozoa other than Arthropoda, Lophotrochozoa (Protostomia other than Ecdysozoa), Bilateria  
224 other than Protostomia and Deuterostomia, Cnidaria, Ctenophora (Eumetazoa other than Cnidaria and Bilateria),  
225 and Metazoa other than Eumetazoa. Based on taxonomic lineage information of EST, TSA, and RefSeq RNA  
226 sequences, which were provided by NCBI Taxonomy, the uORF-tBLASTn and mORF-tBLASTn hit sequences  
227 selected for  $K_a/K_s$  analysis were classified into the 19 taxonomic categories (Supplementary Table S3). The  
228 category 'Ctenophora' was omitted from animal taxonomic categories because no sequences were classified to

229 this category. For each CPuORF, the numbers of transcript sequences classified into each category were counted  
230 and are shown in Supplementary Table S3. These numbers represent the number of orders in which the amino  
231 acid sequence of each CPuORF is conserved.

232

### 233 **Classification of animal CPuORFs into HGs**

234 Systemic numbering of animal CPuORF families (HGs) has not been reported to date. Here, we defined  
235 systematic HG numbers for the identified 1,517 animal CPuORFs. Among these identified CPuORFs, those with  
236 both similar uORF and mORF amino acid sequences were classified into the same HGs. We first determined  
237 ortholog groups of CPuORF-containing genes, referred to as mORF clusters, based on similarities of  
238 mORF-encoded amino acid sequences, using OrthoFinder<sup>17</sup>. The identified CPuORF-containing genes were  
239 classified into 1,194 mORF clusters. CPuORFs contained in each ortholog group (mORF-cluster) were further  
240 classified into uORF clusters, as follows. We conducted a pairwise comparison of uORF peptide similarity using  
241 BLASTp with *E*-values less than 2000 in each mORF cluster. Binarized distance matrixes consisting of 0 (hit) or  
242 1 (no-hit) were generated by this comparison. Hierarchical clustering with single linkage with the cutoff  
243 parameter ( $h = 0.5$ ) was applied to these matrixes for construction of uORF clusters. In total, 1,336 uORF-mORF  
244 clusters were generated automatically. We determined 1,430 clusters by manually checking alignments of uORFs  
245 and mORFs. We assigned HG numbers to the 1,430 clusters in an order based on the number of orders in which  
246 any CPuORF belonging to each HG was extracted, the taxonomic range of the sequence conservation of each  
247 HG, and gene ID numbers. The same HG number with a different sub-number was assigned to CPuORFs in  
248 genes of the same ortholog group with dissimilar uORF sequences (e.g., HG0004.1 and HG0004.2;  
249 Supplementary Table S2).

250

### 251 **Plasmid construction and transient reporter assays**

252 pSV40:Fluc was generated by inserting the SV40 promoter (BglII/HindIII fragment) from pRL-SV40 (Promega,  
253 Madison, WI, USA) into the KpnI site of pGL4.10[luc2] (Promega, Madison, WI, USA) by blunt-end cloning.  
254 The 5'-UTR sequences containing the selected CPuORFs (SacI/XhoI fragment) were fused to the Fluc coding  
255 sequence by subcloning the CPuORFs into the SacI/XhoI site of pSV40:luc2 to generate the WT-aa reporter  
256 construct (pSV40:UTR(WT-aa):Fluc, Fig. 4b, Supplementary Figure S2). To assess the importance of the amino

257 acid sequences with regard to the effects of these CPuORFs on mORF translation, frameshift mutations were  
258 introduced into the CPuORFs so that the amino acid sequences of their conserved regions could be altered. A + 1  
259 or - 1 frameshift was introduced upstream or within the conserved region of each CPuORF, and another  
260 frameshift was introduced before the stop codon to shift the reading frame back to the original frame  
261 (pSV40:UTR(fs):Fluc, Fig. 4b, Supplementary Figure S2). DNA fragments containing the CPuORFs of either  
262 WT-aa or fs mutants from the *PTP4A1*, *MKKS*, *SLC6A8*, *FAM13B*, *MIEF1*, *EIF5*, *MAPK6*, *MEIS2*, *KAT6A*,  
263 *SLC35A4*, *LRRC8B*, *CDH11*, *PNRC2*, *BACH2*, *FGF9*, *PNISR*, and *TMEM184C* genes were synthesized  
264 (GenScript , NJ, USA) and subcloned into the pSV40:Fluc, as shown in Fig. 4b and Supplementary Table S6.  
265 These reporter constructs were each transfected into human HEK293T cells. HEK293T cells (16,000/well) were  
266 cotransfected with 80 ng/well of a pSV40:UTR:Fluc reporter plasmid and 1.6 ng/well pGL4.74[hRluc/TK]  
267 plasmid (Promega, Madison, WI, USA). After 24 h, Firefly luciferase and Renilla luciferase activities were  
268 measured according to the Dual-Luciferase Reporter Assay protocol (Promega, Madison, WI, USA) using  
269 GloMaxR-Multi Detection System(Promega, Madison, WI, USA).

270

### 271 **Statistical and informatic analyses**

272 All programs, except for existing stand-alone programs, such as NCBI-BLAST+ ver. 2.6.0<sup>27</sup>, Clustal Omega  
273 (ClustalO) ver. 1.2.2<sup>28</sup>, OrthoFinder ver. 1.1.4<sup>17</sup>, velvet ver. 1.2.10<sup>25</sup>, Bowtie2 ver. 2.2.9<sup>26</sup>, and Jalview ver. 2.10.2  
274<sup>29</sup>, were written in R (www.r-project.org). We also used R libraries, GenomicRanges ver. 1.32.7<sup>30</sup>,  
275 exactRankTests ver. 0.8.30, Biostrings ver. 2.48.0, and seqinr ver. 3.4.5<sup>31</sup>. Statistical differences between the  
276 control (WT-aa) and fs constructs were determined by Student's *t*-tests in transient assays.

277

278

279

280

281

282

283

## 284 **References**

- 285 1 Ingolia, N. T. *et al.* Ribosome profiling reveals pervasive translation outside of annotated protein-coding  
286 genes. *Cell Rep.* **8**, 1365-1379, doi:10.1016/j.celrep.2014.07.045 (2014).
- 287 2 Morris, D. R. & Geballe, A. P. Upstream open reading frames as regulators of mRNA translation.  
288 *Molecular and cellular biology* **20**, 8635-8642 (2000).
- 289 3 Cruz-Vera, L. R., Sachs, M. S., Squires, C. L. & Yanofsky, C. Nascent polypeptide sequences that  
290 influence ribosome function. *Current opinion in microbiology* **14**, 160-166,  
291 doi:10.1016/j.mib.2011.01.011 (2011).
- 292 4 Ito, K. & Chiba, S. Arrest peptides: cis-acting modulators of translation. *Annual review of biochemistry*  
293 **82**, 171-202, doi:10.1146/annurev-biochem-080211-105026 (2013).
- 294 5 Somers, J., Poyry, T. & Willis, A. E. A perspective on mammalian upstream open reading frame  
295 function. *The international journal of biochemistry & cell biology* **45**, 1690-1700,  
296 doi:10.1016/j.biocel.2013.04.020 (2013).
- 297 6 Bhushan, S. *et al.* Structural basis for translational stalling by human cytomegalovirus and fungal  
298 arginine attenuator peptide. *Molecular cell* **40**, 138-146, doi:10.1016/j.molcel.2010.09.009 (2010).
- 299 7 Wang, Z. & Sachs, M. S. Ribosome stalling is responsible for arginine-specific translational attenuation  
300 in *Neurospora crassa*. *Molecular and cellular biology* **17**, 4904-4913 (1997).
- 301 8 Hayden, C. A. & Jorgensen, R. A. Identification of novel conserved peptide uORF homology groups in  
302 *Arabidopsis* and rice reveals ancient eukaryotic origin of select groups and preferential association with  
303 transcription factor-encoding genes. *BMC biology* **5**, 32, doi:10.1186/1741-7007-5-32 (2007).
- 304 9 Tran, M. K., Schultz, C. J. & Baumann, U. Conserved upstream open reading frames in higher plants.  
305 *BMC genomics* **9**, 361, doi:10.1186/1471-2164-9-361 (2008).
- 306 10 Takahashi, H., Takahashi, A., Naito, S. & Onouchi, H. BAIUCAS: a novel BLAST-based algorithm for  
307 the identification of upstream open reading frames with conserved amino acid sequences and its

- 308 application to the *Arabidopsis thaliana* genome. *Bioinformatics* **28**, 2231-2241,  
309 doi:10.1093/bioinformatics/bts303 (2012).
- 310 11 Vaughn, J. N., Ellingson, S. R., Mignone, F. & Arim, A. Known and novel post-transcriptional  
311 regulatory sequences are conserved across plant families. *Rna* **18**, 368-384, doi:10.1261/rna.031179.111  
312 (2012).
- 313 12 van der Horst, S., Snel, B., Hanson, J. & Smeekens, S. Novel pipeline identifies new upstream ORFs  
314 and non-AUG initiating main ORFs with conserved amino acid sequences in the 5' leader of mRNAs in  
315 *Arabidopsis thaliana*. *Rna* **25**, 292-304, doi:10.1261/rna.067983.118 (2018).
- 316 13 Takahashi, H. *et al.* Comprehensive genome-wide identification of angiosperm upstream ORFs with  
317 peptide sequences conserved in various taxonomic ranges using a novel pipeline, ESUCA. *BMC*  
318 *genomics* **21**, 260, doi:10.1186/s12864-020-6662-5 (2020).
- 319 14 Zerbino, D. R. *et al.* Ensembl 2018. *Nucleic acids research* **46**, D754-D761, doi:10.1093/nar/gkx1098  
320 (2018).
- 321 15 Crowe, M. L., Wang, X. Q. & Rothnagel, J. A. Evidence for conservation and selection of upstream  
322 open reading frames suggests probable encoding of bioactive peptides. *BMC genomics* **7**, 16,  
323 doi:10.1186/1471-2164-7-16 (2006).
- 324 16 Hayden, C. A. & Bosco, G. Comparative genomic analysis of novel conserved peptide upstream open  
325 reading frames in *Drosophila melanogaster* and other dipteran species. *BMC genomics* **9**, 61,  
326 doi:10.1186/1471-2164-9-61 (2008).
- 327 17 Emms, D. M. & Kelly, S. OrthoFinder: solving fundamental biases in whole genome comparisons  
328 dramatically improves orthogroup inference accuracy. *Genome Biol.* **16**, 157,  
329 doi:10.1186/s13059-015-0721-2 (2015).
- 330 18 Hardy, S. *et al.* Magnesium-sensitive upstream ORF controls PRL phosphatase expression to mediate  
331 energy metabolism. *Proceedings of the National Academy of Sciences of the United States of America*  
332 **116**, 2925-2934, doi:10.1073/pnas.1815361116 (2019).

- 333 19 Akimoto, C. *et al.* Translational repression of the McKusick-Kaufman syndrome transcript by unique  
334 upstream open reading frames encoding mitochondrial proteins with alternative polyadenylation sites.  
335 *Biochimica et biophysica acta* **1830**, 2728-2738 (2013).
- 336 20 Samandi, S. *et al.* Deep transcriptome annotation enables the discovery and functional characterization  
337 of cryptic small proteins. *eLife* **6**, doi:10.7554/eLife.27860 (2017).
- 338 21 Li, W. & Godzik, A. Cd-hit: a fast program for clustering and comparing large sets of protein or  
339 nucleotide sequences. *Bioinformatics* **22**, 1658-1659, doi:10.1093/bioinformatics/btl158 (2006).
- 340 22 Lintner, N. G. *et al.* Selective stalling of human translation through small-molecule engagement of the  
341 ribosome nascent chain. *PLoS biology* **15**, e2001882, doi:10.1371/journal.pbio.2001882 (2017).
- 342 23 Yamashita, Y. *et al.* Sucrose sensing through nascent peptide-mediated ribosome stalling at the stop  
343 codon of Arabidopsis *bZIP11* uORF2. *FEBS letters* **591**, 1266-1277, doi:10.1002/1873-3468.12634  
344 (2017).
- 345 24 Cunningham, F. *et al.* Ensembl 2019. *Nucleic Acids Res* **47**, D745-D751, doi:10.1093/nar/gky1113  
346 (2019).
- 347 25 Zerbino, D. R. & Birney, E. Velvet: algorithms for de novo short read assembly using de Bruijn graphs.  
348 *Genome research* **18**, 821-829, doi:10.1101/gr.074492.107 (2008).
- 349 26 Langmead, B. & Salzberg, S. L. Fast gapped-read alignment with Bowtie 2. *Nature methods* **9**, 357-359,  
350 doi:10.1038/nmeth.1923 (2012).
- 351 27 Altschul, S. F. *et al.* Gapped BLAST and PSI-BLAST: a new generation of protein database search  
352 programs. *Nucleic acids research* **25**, 3389-3402 (1997).
- 353 28 Sievers, F. *et al.* Fast, scalable generation of high-quality protein multiple sequence alignments using  
354 Clustal Omega. *Molecular systems biology* **7**, 539, doi:10.1038/msb.2011.75 (2011).
- 355 29 Clamp, M., Cuff, J., Searle, S. M. & Barton, G. J. The Jalview Java alignment editor. *Bioinformatics* **20**,  
356 426-427, doi:10.1093/bioinformatics/btg430 (2004).
- 357 30 Lawrence, M. *et al.* Software for computing and annotating genomic ranges. *PLoS computational*

358 *biology* **9**, e1003118, doi:10.1371/journal.pcbi.1003118 (2013).

359 31 Charif, D. & Lobry, J. R. in *Structural Approaches to Sequence Evolution: Molecules, Networks,*  
360 *Populations* (eds U. Bastolla, M. Porto, H.E. Roman, & M. Vendruscolo) 207-232 (Springer  
361 Verlag, 2007).

362

363

364

365

366

367

368

369

370

371

372

373

374

375

376

377

378

379

380

381

382

383

384

385 **Acknowledgement**

386 This work was supported by the Japan Society for the Promotion of Science (JSPS) KAKENHI (grant nos.  
387 JP19H02917 to H.O., JP16K07387 to H.O., JP19K22892 to H.T., JP18H03330 to H.T., M.I, and H.O.,  
388 JP18H02568 to M.I.); the Ministry of Education, Culture, Sports, Science and Technology (MEXT) KAKENHI  
389 (grant nos. JP17H05658 to S.N., JP26114703 to H.T, JP17H05659 to H.T); the Naito Foundation (to H.O.) ; and  
390 the Research Foundation for the Electrotechnology of Chubu (to H.T.).

391

392 **Author contributions**

393 H.T., H.O., and M.I. designed the study. H.T. and S.M., performed experiments and analyzed the data supervised  
394 by S.F., T.E. K.S., S.N., and M.I. H.T., M.M., N.I., T.M., and A.T. contributed reagents/materials/analysis tools.  
395 H.T., H.O., M.I., and S.M. wrote the article with contribution of all coauthors.

396

397 **Additional information**

398 Supplementary information accompanies this paper.

399 Competing financial interests: The authors declare no competing financial interests.

400

401

402

403

404

405

406

407

408



## 409 **Figure Legends**

410 **Figure 1.** Identification of animal CPuORFs using ESUCA. **(a)** Data preparation. **(b)** Outline of the ESUCA  
411 pipeline. Numbers with parenthesis indicate datasets labeled with the same numbers in A.

412

413 **Figure 2.** Defined animal taxonomic categories.

414

415 **Figure 3.** Numbers of CPuORFs extracted by ESUCA in each taxonomic ranges.

416

417 **Figure 4.** Taxonomic conservation and experimental validation of 17 selected human CPuORFs. **(a)** Taxonomic  
418 ranges of conservation of CPuORFs examined in transient assays. Filled cells in each taxonomic category  
419 indicate the presence of uORF-tBLASTn and mORF-tBLASTn hits for CPuORFs of the indicated genes. **(b)**  
420 Reporter constructs used for transient assays. The hatched box in the frameshift (fs) mutant CPuORF indicates  
421 the frame-shifted region. Dotted boxes represent the first five nucleotides of the mORFs associated with the 17  
422 human CPuORFs. **(c)** Relative luciferase activities of WT-aa (white) or frameshift (gray) CPuORF reporter  
423 plasmids. Means  $\pm$  SDs of at least three biological replicates are shown.  $*p < 0.05$ .

424

425

426 **Figure 5.** Extraction of the largest uORF sequences from the 5'-UTR. After data preparation for ESUCA (Fig.  
427 1b), we conducted the extraction of uORF sequences by searching the 5'-UTR sequences for an ATG codon and  
428 its nearest downstream in-frame stop codon at step 1 of ESUCA (Fig. 1b). Sequences starting with an ATG codon  
429 and ending with the nearest in-frame stop codon were extracted as uORF sequences. When multiple uORFs  
430 shared the same stop codon in a transcript, only the longest uORF sequence was used for further analyses.

431

432 **Figure 6.** Outline for uORF-mORF fusion ratio calculations. For each original uORF-containing transcript  
433 sequence, RefSeq RNAs containing both sequences similar to the uORF and the mORF of each  
434 uORF-containing transcript were selected using uORF-tBLASTx and mORF-tBLASTx from the RefSeq RNA  
435 database (database (2) in Fig.1a). For example, the selected RNA sequences are RNA1, 2, 3...10, as illustrated.

436 Based on whether the uORF-tBLASTx-hit region was included in the largest RefSeq RNA ORF, the selected  
437 RefSeq RNAs were classified into two types, namely fusion ( $X$ ) (RNA1 and 2) and separate types ( $Y$ )  
438 (RNA3-10). For each original uORF-containing transcript, the uORF-mORF fusion ratio was calculated as  $X/(X$   
439  $+ Y)$ .

440

441 **Figure 7.** Outline of homology searches for uORFs with amino acid sequences conserved between  
442 homologous genes. (a) For each original uORF-containing transcript, sequences containing both similar regions  
443 to the uORF and the mORF of uORF-containing transcripts were selected using uORF-tBLASTn (step 3.1 of  
444 ESUCA) and mORF-tBLASTn (step 4.1 of ESUCA). A transcript sequence database consisting of RefSeq  
445 RNAs (database (2) in Fig.1a) served as data source, while an assembled EST/TSA (database (3) in Fig.1a) was  
446 generated at step 0.2 of data preparation for ESUCA. Asterisks represent stop codons. At step 3.2 of ESUCA, the  
447 largest tBLASTn-hit region-overlapping uORF was extracted. (b) Detailed illustration of step 4.0 of ESUCA.  
448 Putative uORF extraction and downstream sequence dataset construction were conducted systematically for each  
449 uORF-tBLASTn hit sequence. (c) Detailed illustration of step 4.1 of ESUCA. After mORF-tBLASTn, the  
450 5'-most in-frame ATG codon located downstream of the selected stop codon was identified as the initiation codon  
451 of the putative partial or intact mORF. uORF-mORF overlaps were discarded as fusion types, according to the  
452 positional relationship between them, when found in the hit-assembled EST/TSA+RefSeq sequences.

453

454 **Figure 8.**  $K_a/K_s$  simulation. (a) Putative uORF sequences in the selected transcripts were used for the generation  
455 of uORF amino acid sequence alignments and for  $K_a/K_s$  analysis. (b) ClustalO was used to generate multiple  
456 alignments. (c) For each candidate CPuORF, the median  $K_a/K_s$  ratios for all pairwise combinations of the original  
457 uORF and homologous putative uORFs were calculated using the LWL85 algorithm in the seqinR package. (d)  
458 For the  $K_a/K_s$  ratio statistical tests, we calculated mutation rate distributions between the original uORF and  
459 homologous putative uORFs; subsequently, we artificially generated mutants using the observed mutation rate  
460 distribution. Observed empirical  $K_a/K_s$  ratio distributions were then compared with null distributions (negative

461 controls) using the Mann-Whitney  $U$  test to validate the statistical significance. The one-sided  $U$  test was used to  
462 investigate whether the observed distributions were significantly lower than the null distributions.  
463

## Figure 1

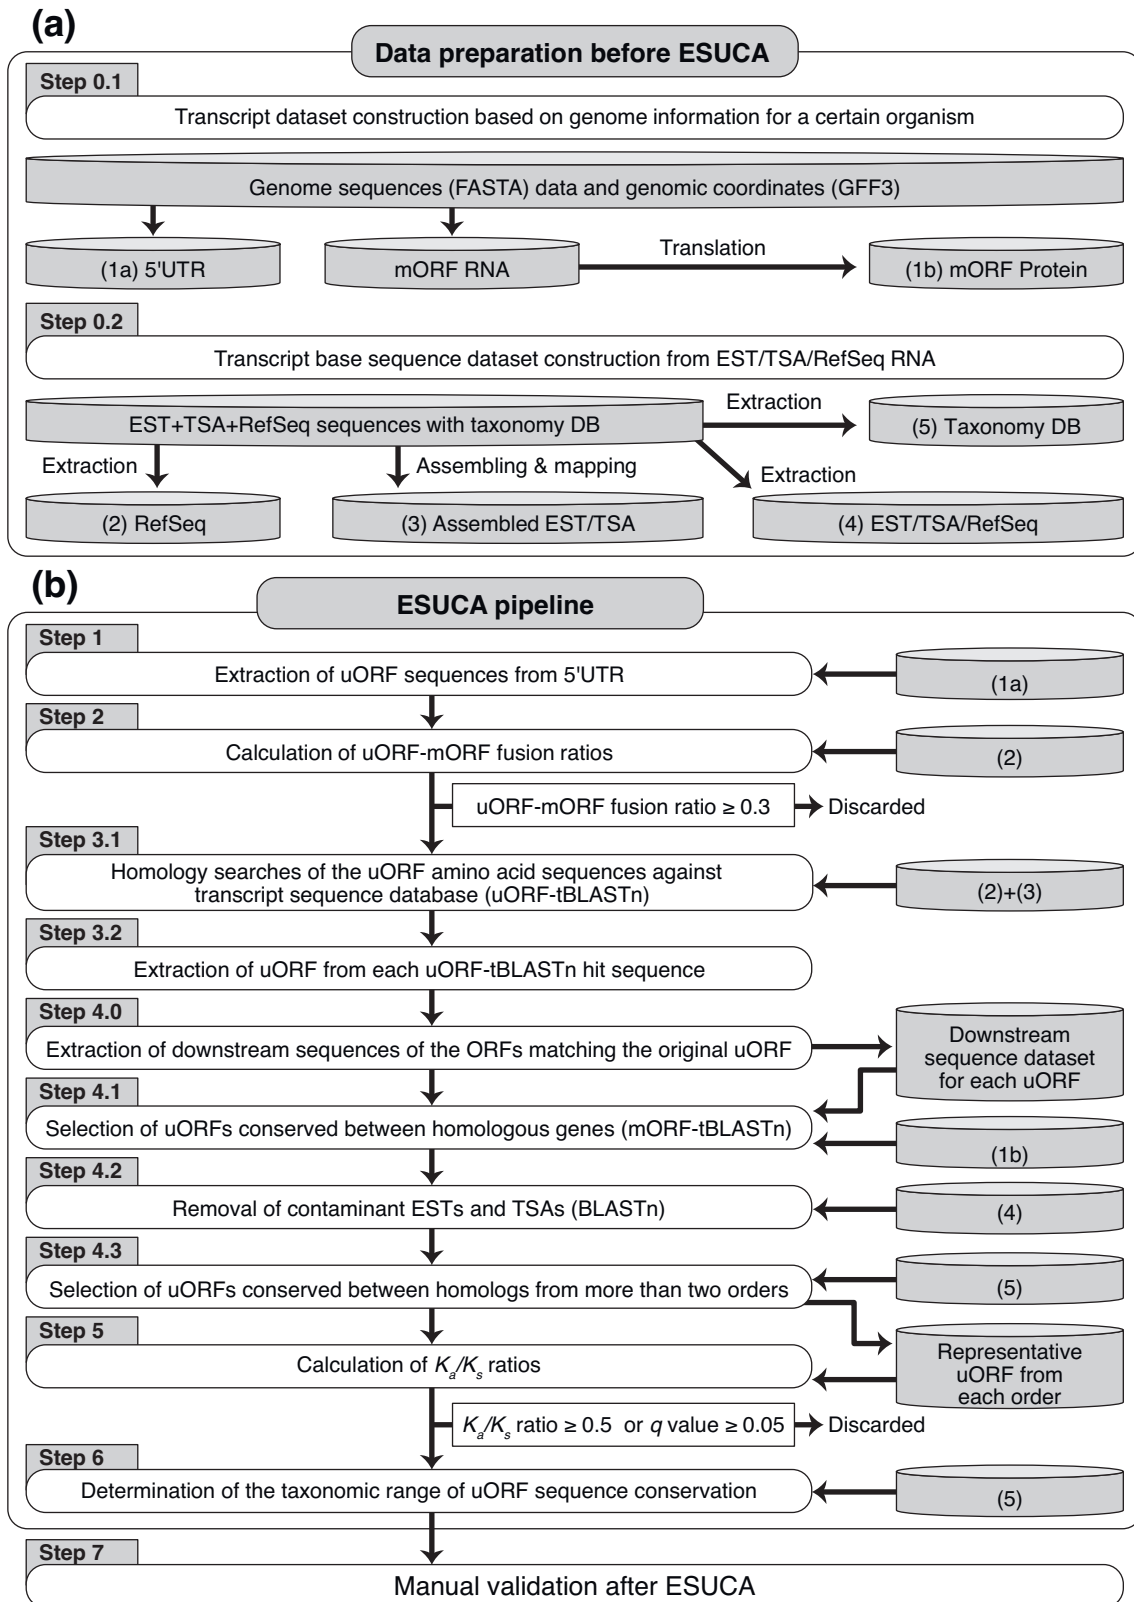

## Figure 2

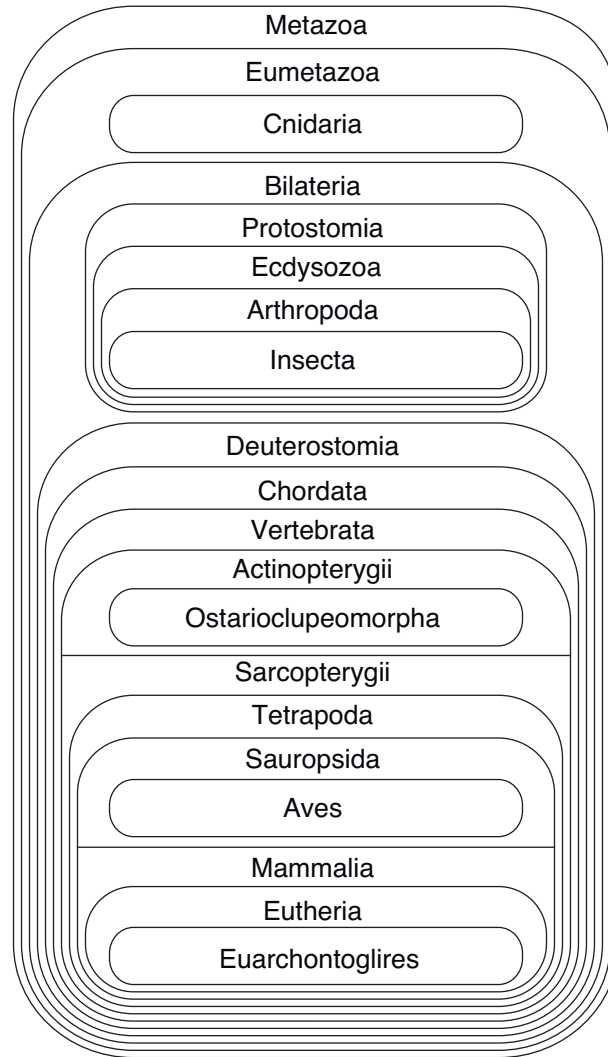

## Figure 3

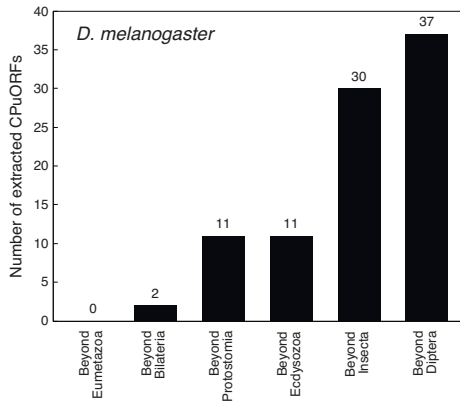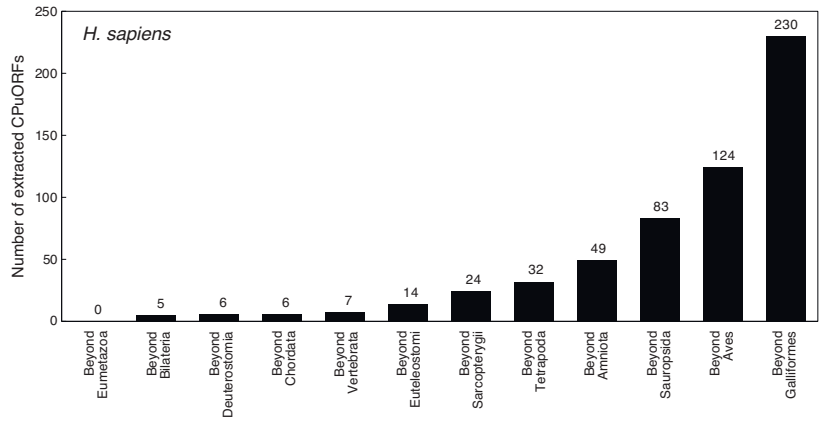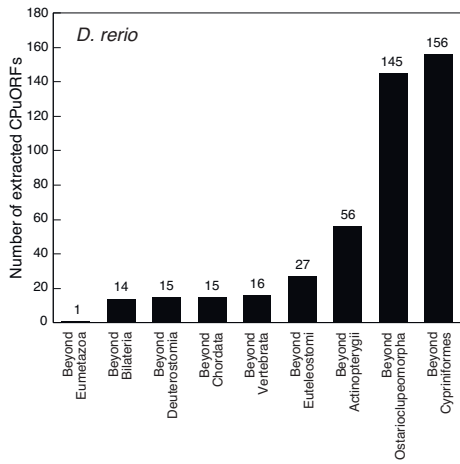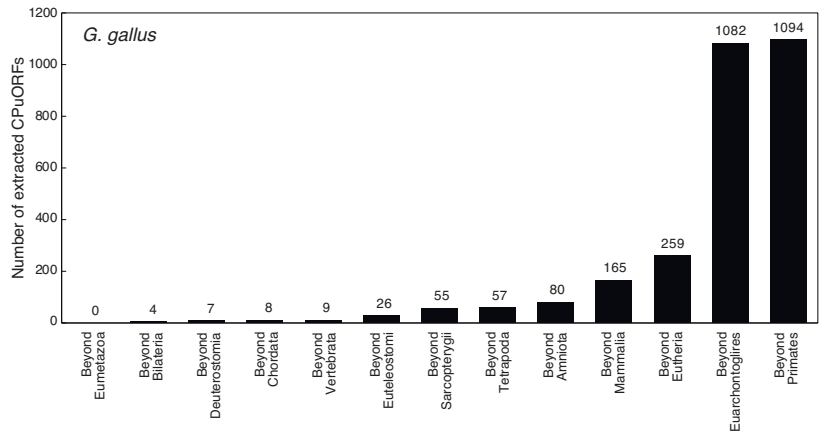

## Figure 4

(a)

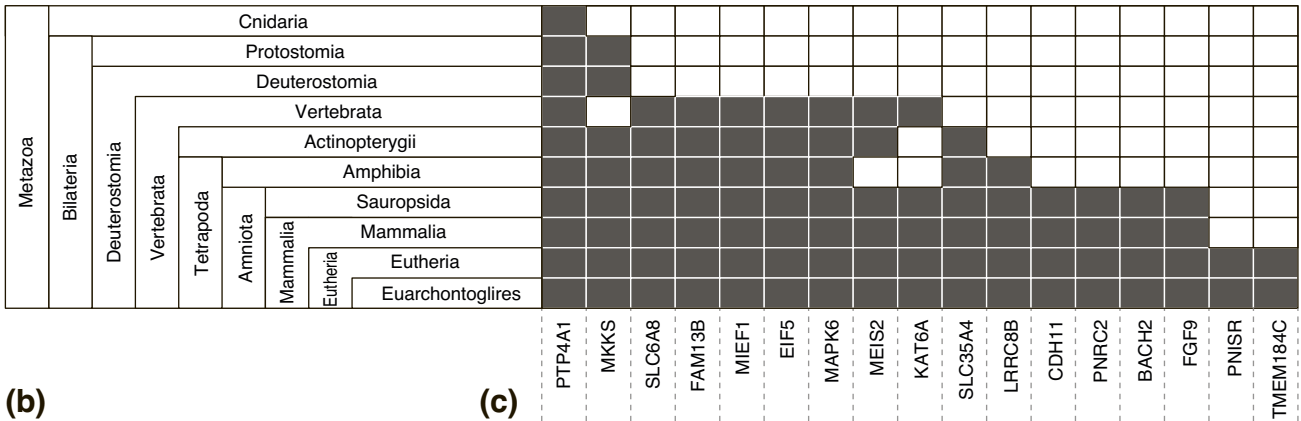

(b)

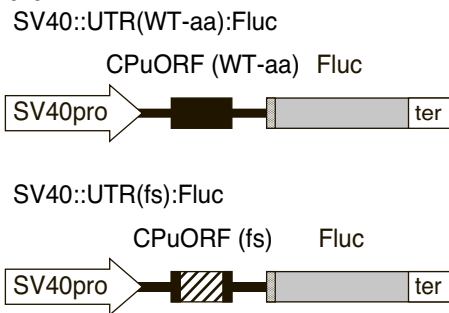

(c)

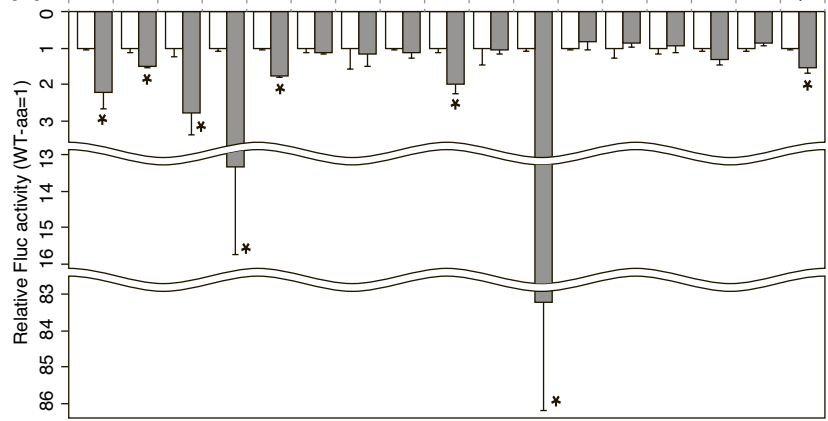

## Figure 5

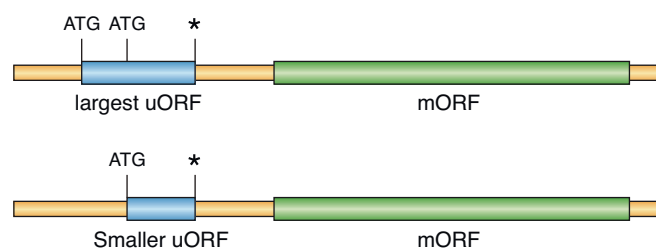



## Figure 6

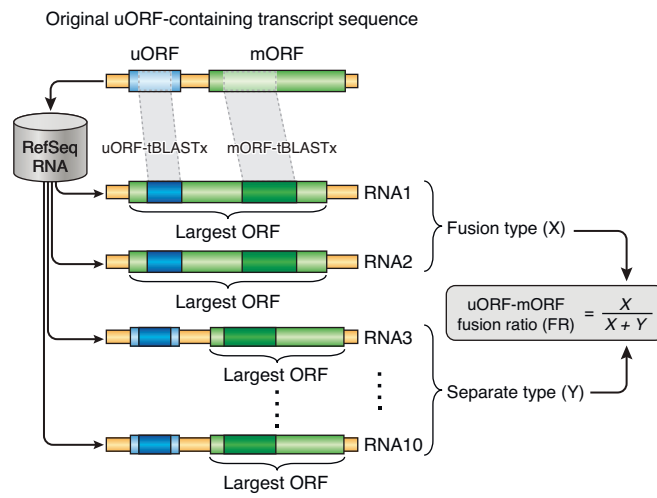

## Figure 7

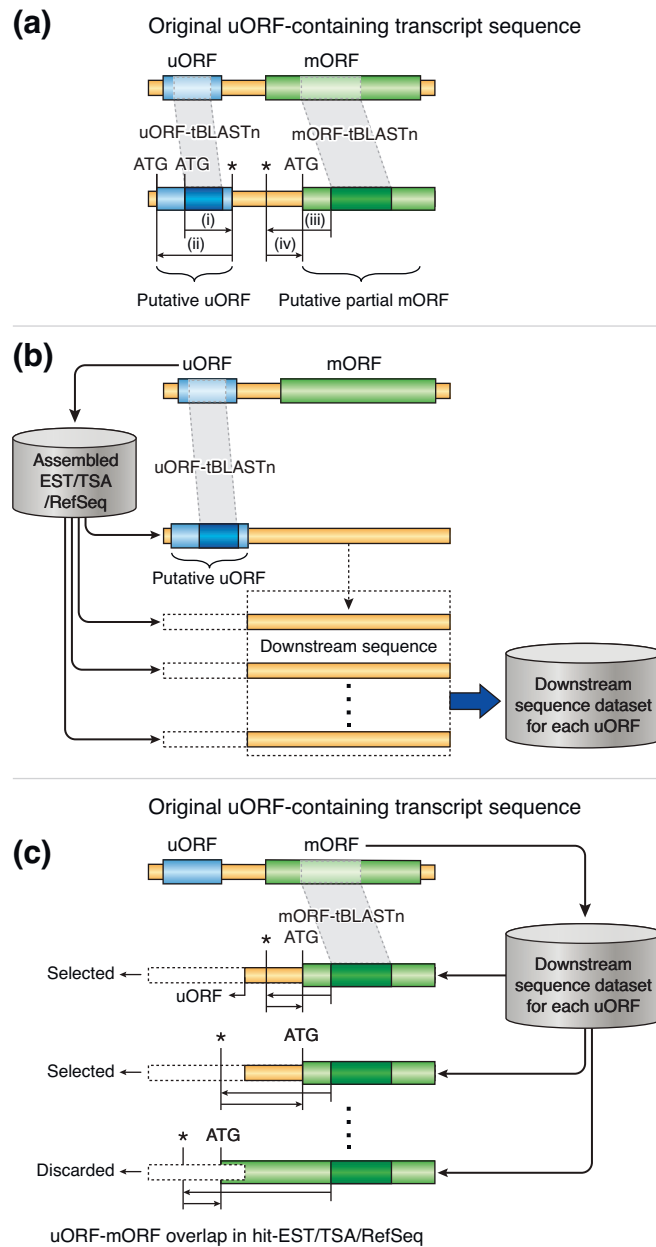

Figure 8

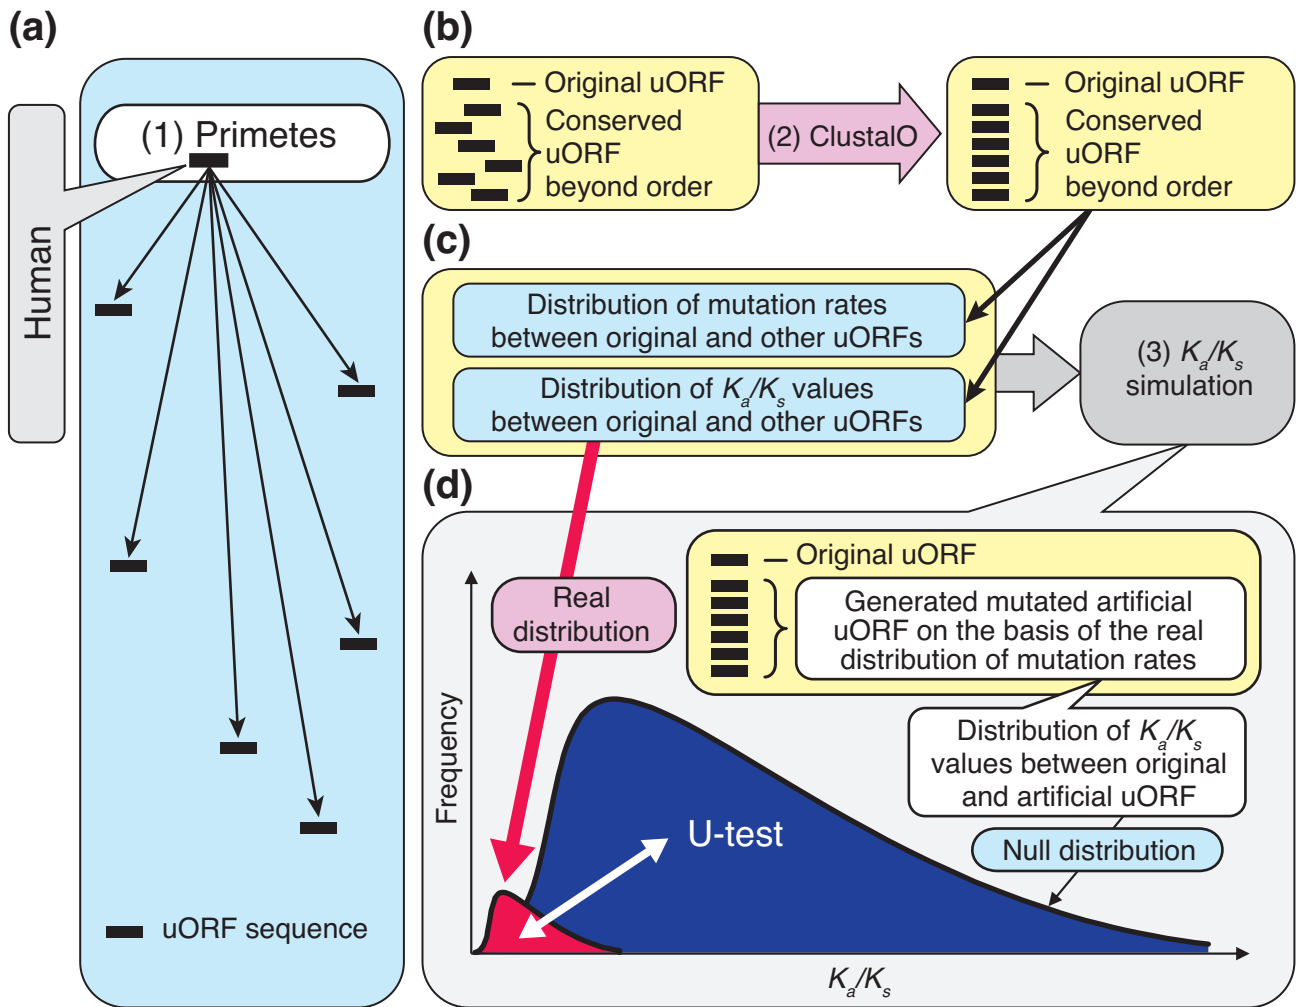

Source: https://www.biorxiv.org/content/10.1101/672840v4.full.pdf
